# Supplementary material
Source: PubMed Central journal article supplement (PMC4011089)
Supplement: supp_141.10.2024_DEV105726.pdf [file supp_141.10.2024_DEV105726.pdf]

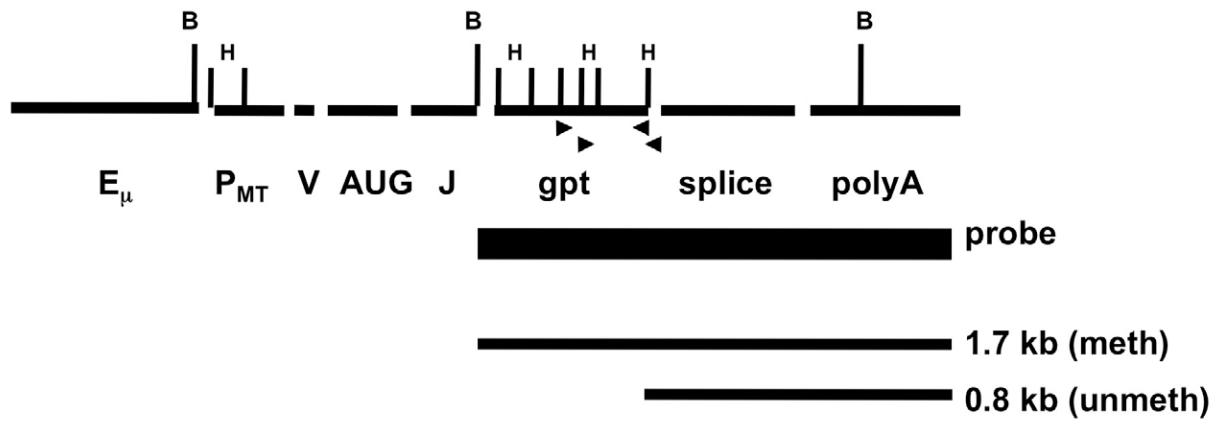

**Fig. S1: HRD transgene.** HRD construct introduced into mouse ESCs. Mice with the HRD transgene were obtained from established ESC lines. The HRD transgenic mice (line #342) mainly used in this report had 6 copies of the HRD transgene (Engler et al. 1991).  $E_{\mu}$ , Ig heavy chain enhancer;  $P_{MT}$ , metallothionein-1 promoter; V, J, Ig recombinase recognition sequences; AUG, rat initiation codon and surrounding sequences; *gpt*, *E.coli gpt* (guanine phosphoribosyl transferase) coding sequence; splice polyA are from SV40. *HpaII* (H) and *BamHI* (B) restriction sites, probe used for Southern blot analysis and the expected band sizes for methylated (meth) and unmethylated (unmeth) regions are shown. Nested PCR primers used for the bisulfite analysis of the 2nd half of the *gpt* region are also indicated.

Initiator motif Downstream promoter element  
TCATTCTCGATGTATCTCGGCTGCCTCGTGGT AGGAAGCCATGGAAGGAGACTAGTCCTAGTATTTCGGGAACCTGAAAACCTTCCTTA (85)

18F → + 29 nts in our cDNA  
AGCTGCAGTTGCTGTGCTGGCCTCTAGGACATTCAGCAGCTGGTCTCTGTTCCTTCCAGGTCAGAGGAGTTGTTGGCTGGGAAACAGG (175)  
TCTCCATATGCTCAGTCAACTCTCCATAACTGTAAATCAACACTAAGAGCACTAGAAGGTTAAAGGTCAGGAGACTCTCAAAAGGATC (265)

CAGAACTTGA M F F A P H Q E S G G R R T T K R M S A S L (20)  
ATG TTT GCT CCT CAC CAA GAA TCT GGG AGA AGA ACA ACT AAA AGA ATG AGT GCT TCT CTG (335)

E N T A Q C L L T F K D V F L D F S S E E W E (43)  
GAA AAC ACT GCA CAG TGT CTA TTA ACC TTC AAG GAT GTG TTT TTG GAC TTC TCA TCA GAG GAA TGG GAA (404)

C L N F A Q R T L Y M D V M L E N Y N N L L F (66)  
TGT CTC AAT TTT GCT CAG AGG ACA TTG TAC ATG GAT GTG ATG TTG GAG AAT TAC AAC AAT CTG TTG TTT (473)

V E N H C I C G N Y E K E K V L E Q D T Q H I (89)  
GTG GAA AAT CAC TGC ATA TGT GGA AAC TAT GAG AAG GAG AAG GTC TTG GAA CAA GAC ACA CAG CAC ATT (542)

495F →  
F N E H G H I Q E K S F K C N E S N N I I H E (112)  
TTC AAT GAG CAT GGG CAT ATC CAA GAG AAG TCT TTT AAA TGT AAT GAG TCT AAC AAT ATA ATT CAT GAA (611)

S S Q S T P H K T N H R D A T L Q S S N L K R (135)  
TCC TCC CAA AGT ACA CCT CAT AAA ACT AAC CAC AGA GAT GCC ACT CTT CAA TCT TCA AAC CTA AAA AGA (680)

H K T R T T K E V C T Y K D C V N R L K V S S (158)  
CAT AAA ACT CGG ACC ACT AAA GAA GTT TGC ACA TAT AAA GAC TGT GTA AAC CGT TTA AAG GTG TCT TCT (749)

T I S L N Q G T H I E K K E H N R N K N L D E (181)  
ACC ATT AGT CTC AAT CAA GGA ACC CAC ATA GAG AAG AAA GAA CAC AAC AGA AAT AAA AAT CTT GAT GAG (818)

V L V S K H K P I V R Q N N S E M N T Y T C G (204)  
GTT TTG GTT TCT AAA CAT AAA CCC ATT GTG AGA CAA AAC AAT AGT GAA ATG AAC ACT TAC ACT TGT GGT (887)

E F D K C F T Q S D N L Q S Q Q R I Y P L K K (227)  
GAA TTT GAC AAA TGC TTT ACT CAG AGT GAC AAT CTT CAA AGT CAG CAG AGA ATT TAT CCA TTA AAG AAA (956)

S Y K Y S E S D K C F T Q K F Y L G I H Q K I (250)  
TCT TAC AAA TAT AGT GAA AGT GAC AAA TGC TTT ACA CAA AAG TTC TAT CTT GGT ATC CAT CAG AAA ATT (1025)

H T G E K F Y K C N E S D K C F K H K F N L S (273)  
CAT ACT GGA GAG AAA TTT TAT AAA TGT AAT GAA AGT GAC AAA TGT TTT AAA CAC AAA TTC AAT CTT AGT (1094)

M H Q R I H T G E K T Y K C I E C N K C F M Q (296)  
ATG CAT CAG AGA ATT CAT ACA GGA GAG AAA ACT TAC AAA TGC ATT GAA TGT AAC AAA TGC TTT ATG CAA (1163)

Q S L L S N H E R I H T G K K P Y K C S E C D (319)  
CAA TCC CTT CTT AGT AAT CAT GAG AGA ATT CAT ACA GGA AAG AAG CCT TAC AAA TGT AGT GAA TGT GAC (1232)

K C F T H Q V S L S I H Q R I H S E K K P S K (342)  
AAA TGC TTT ACC CAC CAA GTT AGT CTG AGT ATT CAT CAG AGA ATT CAT TCA GAA AAG AAA CCT TCC AAA (1301)

Y S E C E K C F T H K F N L R T H Q T I H T G (365)  
TAT AGT GAG TGT GAA AAA TGC TTT ACC CAC AAA TTT AAT CTG AGA ACA CAT CAG ACA ATT CAT ACA GGA (1370)

E K P Y K C S E C D K C F T H Q V S L R I H Q (388)  
GAG AAA CCT TAC AAA TGC AGT GAA TGT GAC AAA TGC TTT ACC CAC CAA GTT AGT CTG CGT ATT CAT CAA (1439)

R T H S G E K P Y K C T E C Y K C F A (407)  
AGA ACT CAT TCA GGA GAG AAA CCT TAC AAA TGT ACT GAA TGT TAC AAG TGC TTT GCT TAA (1499)

TAATGCAGTCTGAGAAATGATCAGAGAAATTCATAGAGGAGAGAAAACCTTACAAATATAGTGAATGTGATAAATGCTTTACCCAAAATAAC (1589)  
CATCTGAAAAGTCATCAGAGAAATTCGTAATGAGACAAAACCTTACGAATGTTGTATATGTGACAAATGCATTACCACAACCTCAGTGTA (1679)  
GAAATGTCAGAGATGTCATATAGTGGAGAAAATTTAAAAGTGAATGAATGAGGGAAATCCTTTATGAAGAAATATCATCTAGAAATTC (1769)  
TACAAAATAGTGTAGGAGAGAAAACCTTCAAAATGATGGAAGATGTAATCCTTTAGTTTGGCCTATCTCTTAGAATTTAACAGAGA (1859)  
AAATATTCAGCCAAGAAATCTTAACAAATATAATGATGACAGAAATATCTTTGACTTTATTTACAGTTAAAGAAAACATATAAACATTTTT (1949)  
TTATGAGGAAAGTATTTCTGCTGGGAAAATGTGGCCTATGTTTTATTTAGGGTGTATTTCTTTGCAATACTTACATCTCTACAATGAGAA (2039)  
TCAGAAATGATCAGAAATCTTATGAAAATCTTCTCACAAATGTGTATGCTTTAGATAATGTCAACTATTTATGCTGAGAGAAAACCTGAA (2129)  
AATGTGACAATATAGGAAAGCTTTCATTAACCTTTACTTGTTCACCTCTCAAAATATATAAGATCAAGATAAGTGGGGAAGCCATACGAC (2219)  
TATAGTATTGTGTAACCTTTTCATGGAGACAGAAATAATAAATTTCAAAGGAATCTAATTAAGGTATATACTACACTCTAAAAGTATC (2309)  
TAATAAAACAGGCAGCAATCTGTATATATAAATGAAAATGAAAAGTTCAGGCAAAATGTACTTAAAATGTATTGACAAAAGTGAACCC (2399)  
AAGACTGCATTTCCCTTATCCAATATTTATACCTACAGATGTGAAGTTGCTTTGAGTATCCAGTATTCATAATTTTCTATCAAGTATTG (2489)  
GTTTCTTGTTCAGATAAACAACCTGATTTATGACCCCTTTTGTTCAGTCAACAACCTCTTCACTAATGTATTGTAATAAAGCTGAAT (2579)

GATTCACCAATAAAAAAAAAAAAAA (2605) ← 2515R

CTCGATGT..... exon 1  
GTCTCCAT..... exon 2  
AACTTCAA..... exon 3  
TGTCTATT..... exon 4  
AAAATCAC..... exon 5

KRAB domain  
Non functional zinc fingers  
Functional zinc fingers

■ Amino acid change that makes a potential zinc finger non-functional

**Fig. S2: cDNA and amino acid sequence of *Ssm1b*.** The *Ssm1b* cDNA consists of five exons that are marked in different colors. The corresponding amino acids are noted above their respective codons. The additional 29 nts that we obtained in our PCR amplification (but is not observed in NM\_145078) is underlined. The numbers in parentheses are the nucleotide/amino acid number. The initiator element and the downstream promoter enhancer are also underlined. In the amino acid sequence the KRAB domain and the zinc fingers are demarcated with different colors. The functional zinc fingers are colored yellow while the non-functional ones are in gray. The essential cysteines and histidines in a zinc finger are circled. The amino acid change that makes a zinc finger non-functional is colored red. The primers 18F, 495F and 2515R used to analyze the *Ssm1* DNA and cDNA are boxed.

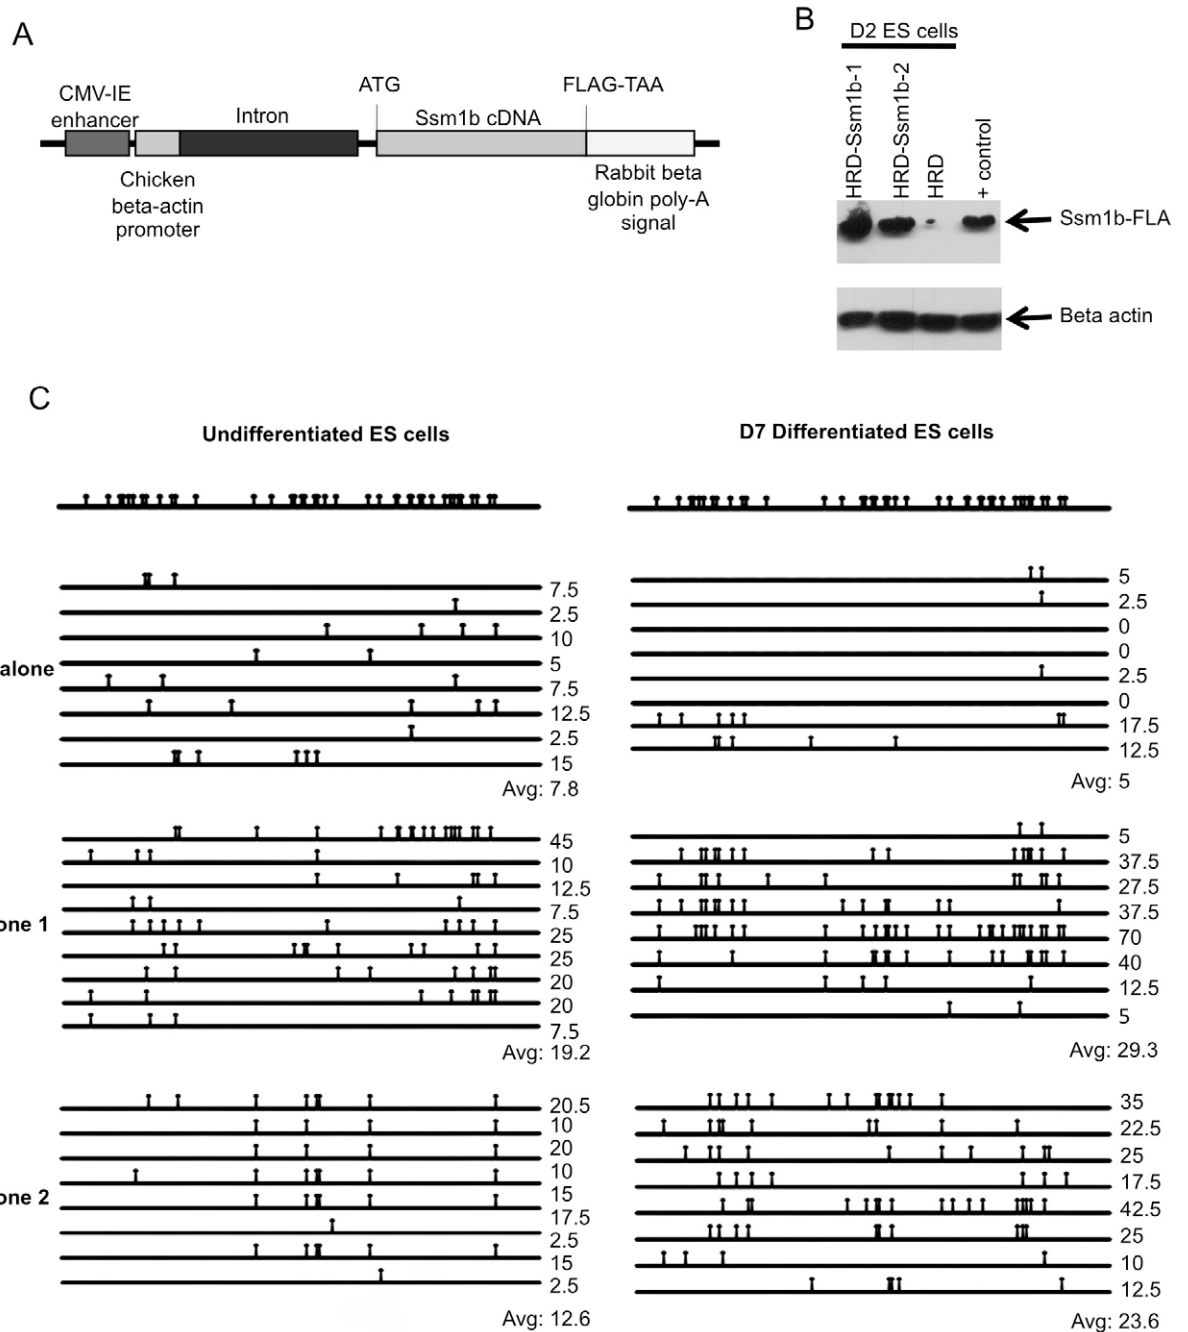

**Fig. S3: *HRD* gains methylation upon differentiation of D2 ESCs expressing *Ssm1b* cDNA.** (A) *Ssm1b*-FLAG cDNA construct that was introduced into D2 (non-methylating strain) ESCs. (B) Western blot showing expression of *Ssm1b*-FLAG protein in D2 ESCs transfected with *Ssm1b*-FLAG cDNA construct. + control: ESCs protein lysate from a previous experiment expressing *Ssm1b*-Flag protein. (C) Bisulfite analysis: Increase in *HRD* methylation in two independent clones of D2 ESCs expressing the *Ssm1b*-FLAG-cDNA transgene.

A

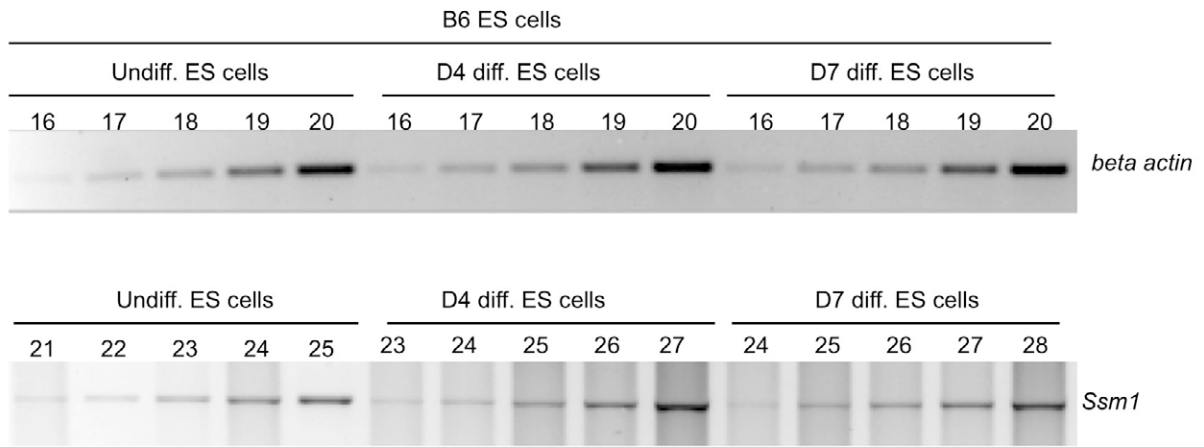

B

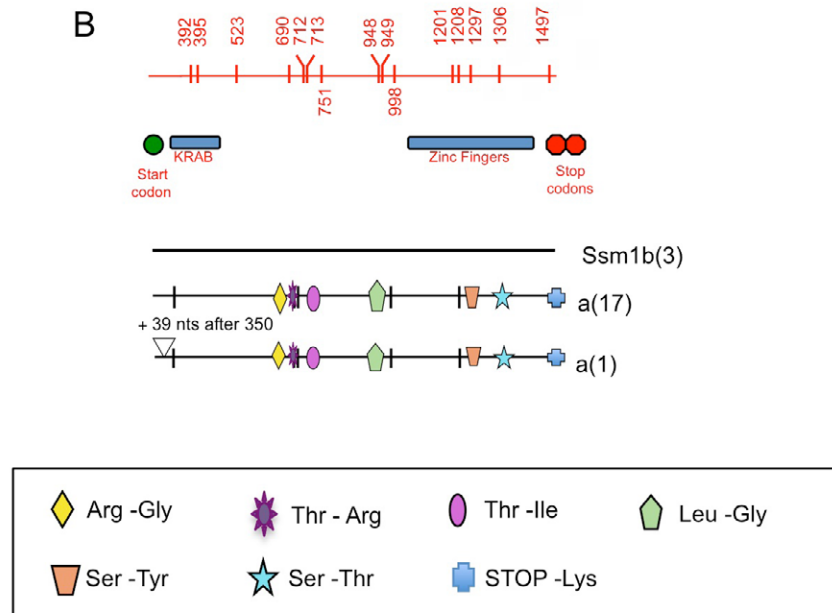

**Fig. S4: Decrease in *Ssm1* expression upon ESC differentiation.** (A) RT-PCR of *beta actin* (top panel) and *Ssm1* (bottom panel) in B6 undifferentiated, day 4 (D4) differentiated and D7 differentiated ESCs. The number of PCR cycles are depicted as numbers above the gels. *Ssm1* expression in D7 differentiated cells falls to 12.5% of its expression level in undifferentiated cells. (B) Expression of *Ssm1* in B6 D4 differentiated ESCs. The *Ssm1* cDNA PCR amplified product amplified [using primers 18F and 2515R (Table S1)] was cloned and sequenced. Each horizontal line represents a sequence from 1, 3 or 17 bacterial clones. The lines labeled *Ssm1b* represent the sequence that matches the genomic sequence of *Ssm1b* and hence is the *Ssm1b* cDNA. The lines marked a and b represent the other *Ssm1b*-like sequences. The numbers in parentheses indicate the number of clones for each sequence. SNPs causing amino acid changes are marked with a symbol and the actual amino acid changes are depicted below.

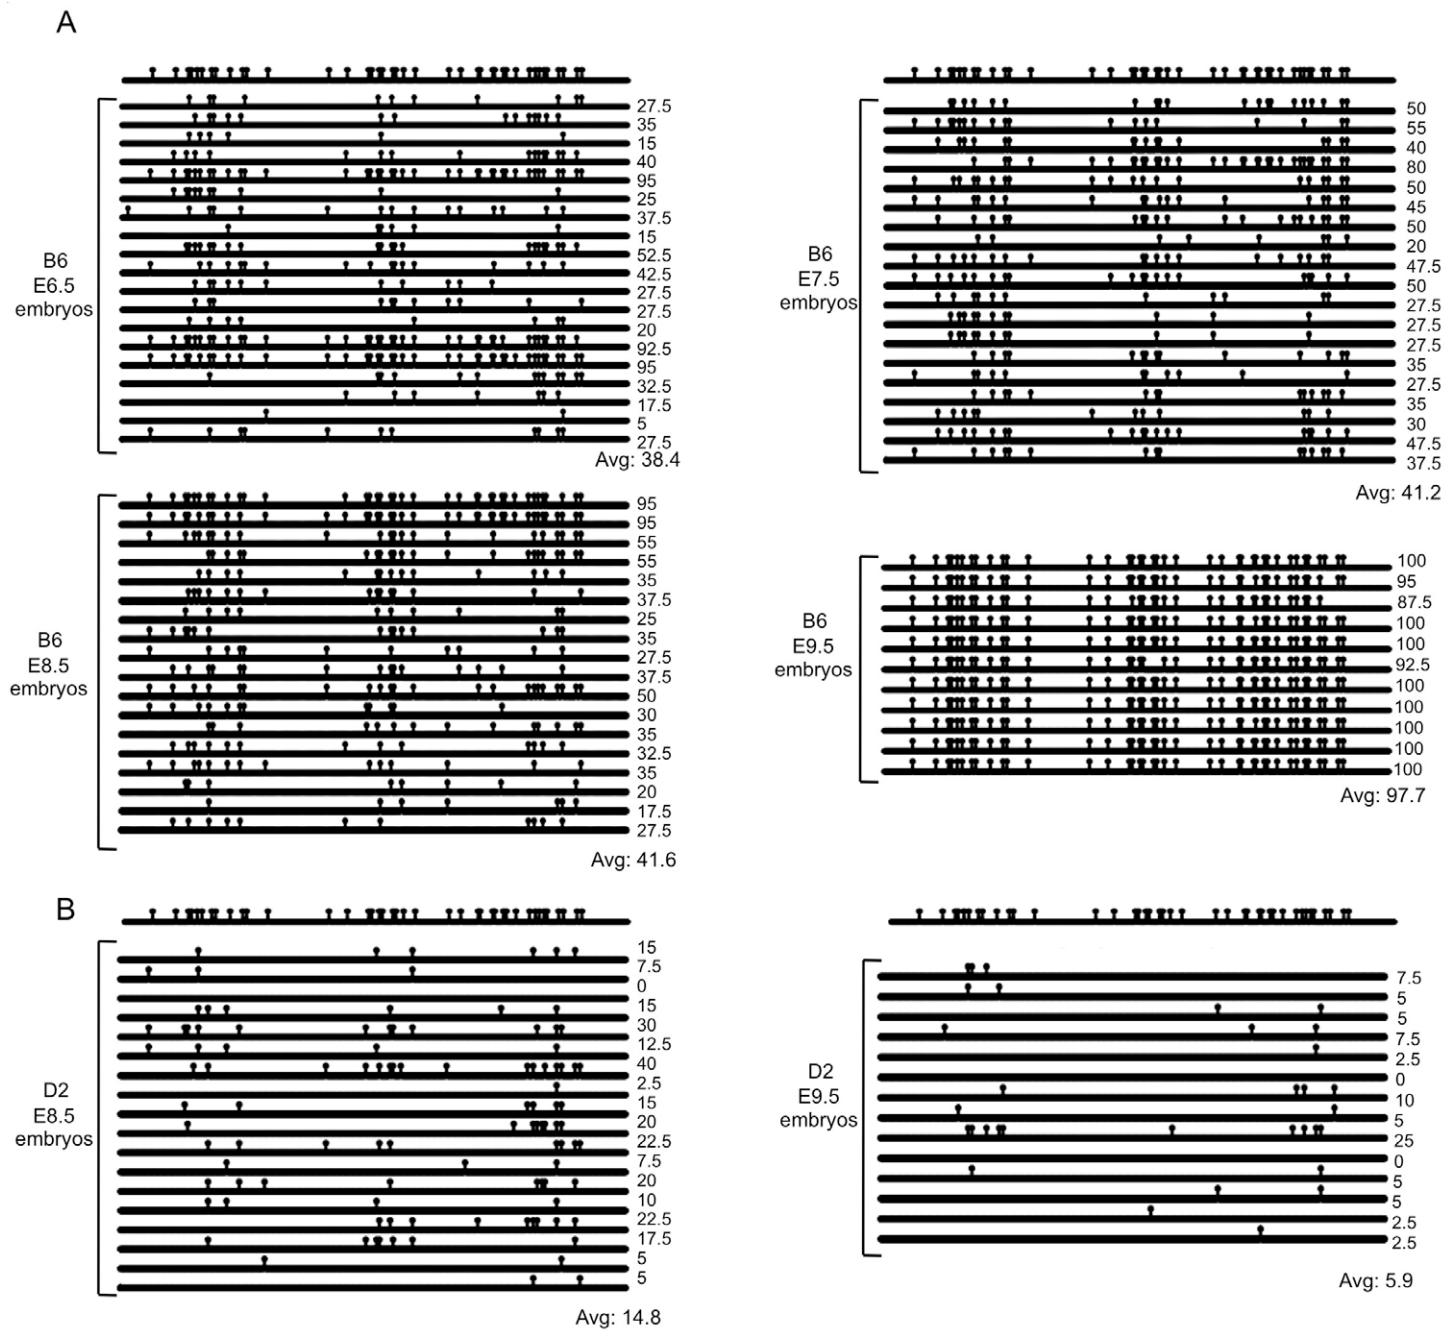

**Fig. S5: HRD-*gpt* methylation during early mouse development.** (A) Bisulfite analysis showing gain in HRD methylation from E6.5 to E9.5 (B6 x D2)F1 mouse embryos. All CpG dinucleotides present in the analyzed sequence are shown above the data. Numbers by each horizontal line indicate the percentage of CpGs methylated per sequence; Avg = average % of CpG methylation. (B) Bisulfite analysis showing low HRD methylation in E8.5 and E9.5 D2 mouse embryos.

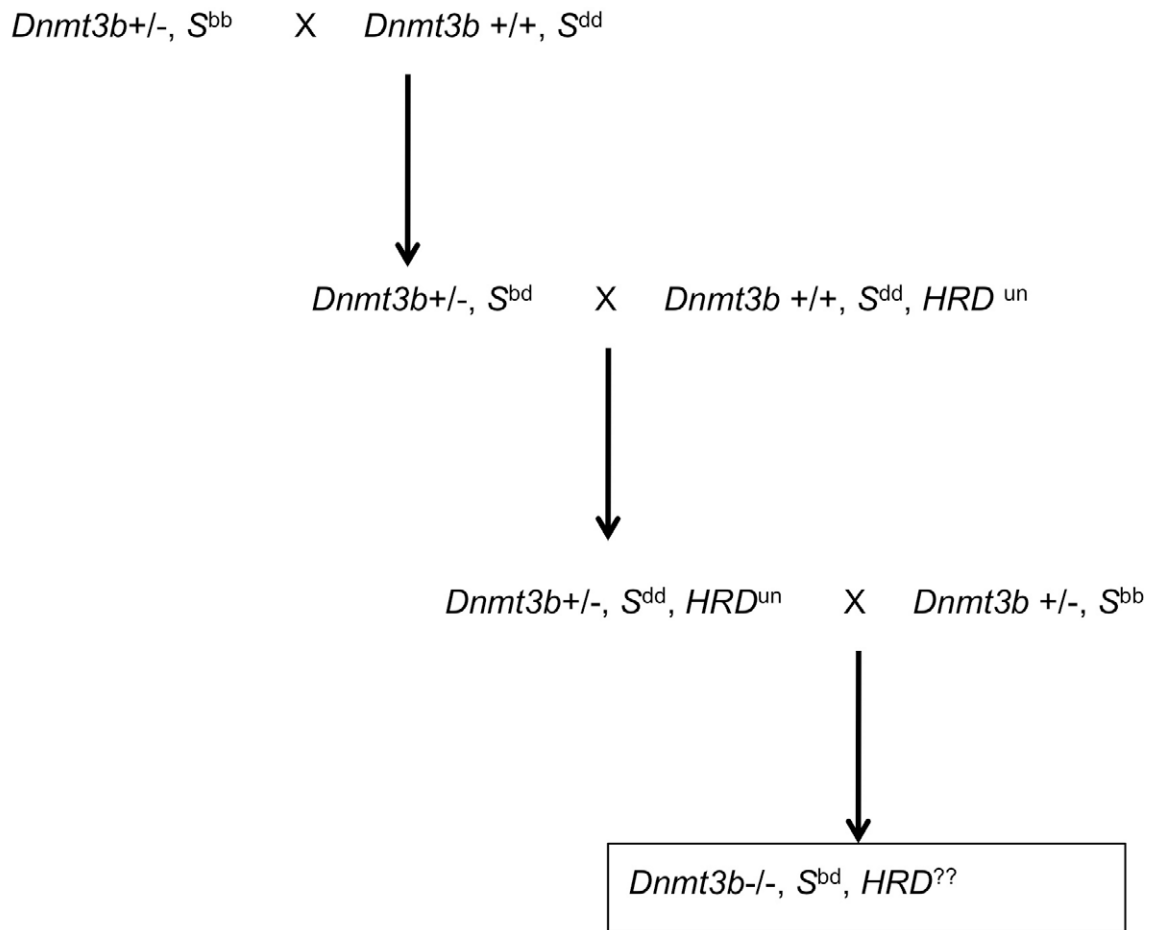

**Fig S6: Breeding scheme used to obtain *Dnmt3b* knockout embryos with *Ssm1b* expression.** *Dnmt3b*<sup>+/+</sup> = *Dnmt3b* wildtype mouse, *Dnmt3b*<sup>+/-</sup> = *Dnmt3b* heterozygous mouse, *Dnmt3b*<sup>-/-</sup> = *Dnmt3b* homozygous knockout mouse; *S*<sup>bb</sup> = *Ssm1b* homozygous mouse, *S*<sup>bd</sup> = *Ssm1b*/*Ssm1d* heterozygous mouse, *S*<sup>dd</sup> = *Ssm1d* homozygous mouse (and therefore lacking *Ssm1b* expression). HRD<sup>un</sup> = unmethylated HRD, HRD<sup>??</sup> = HRD methylation status to be analyzed.

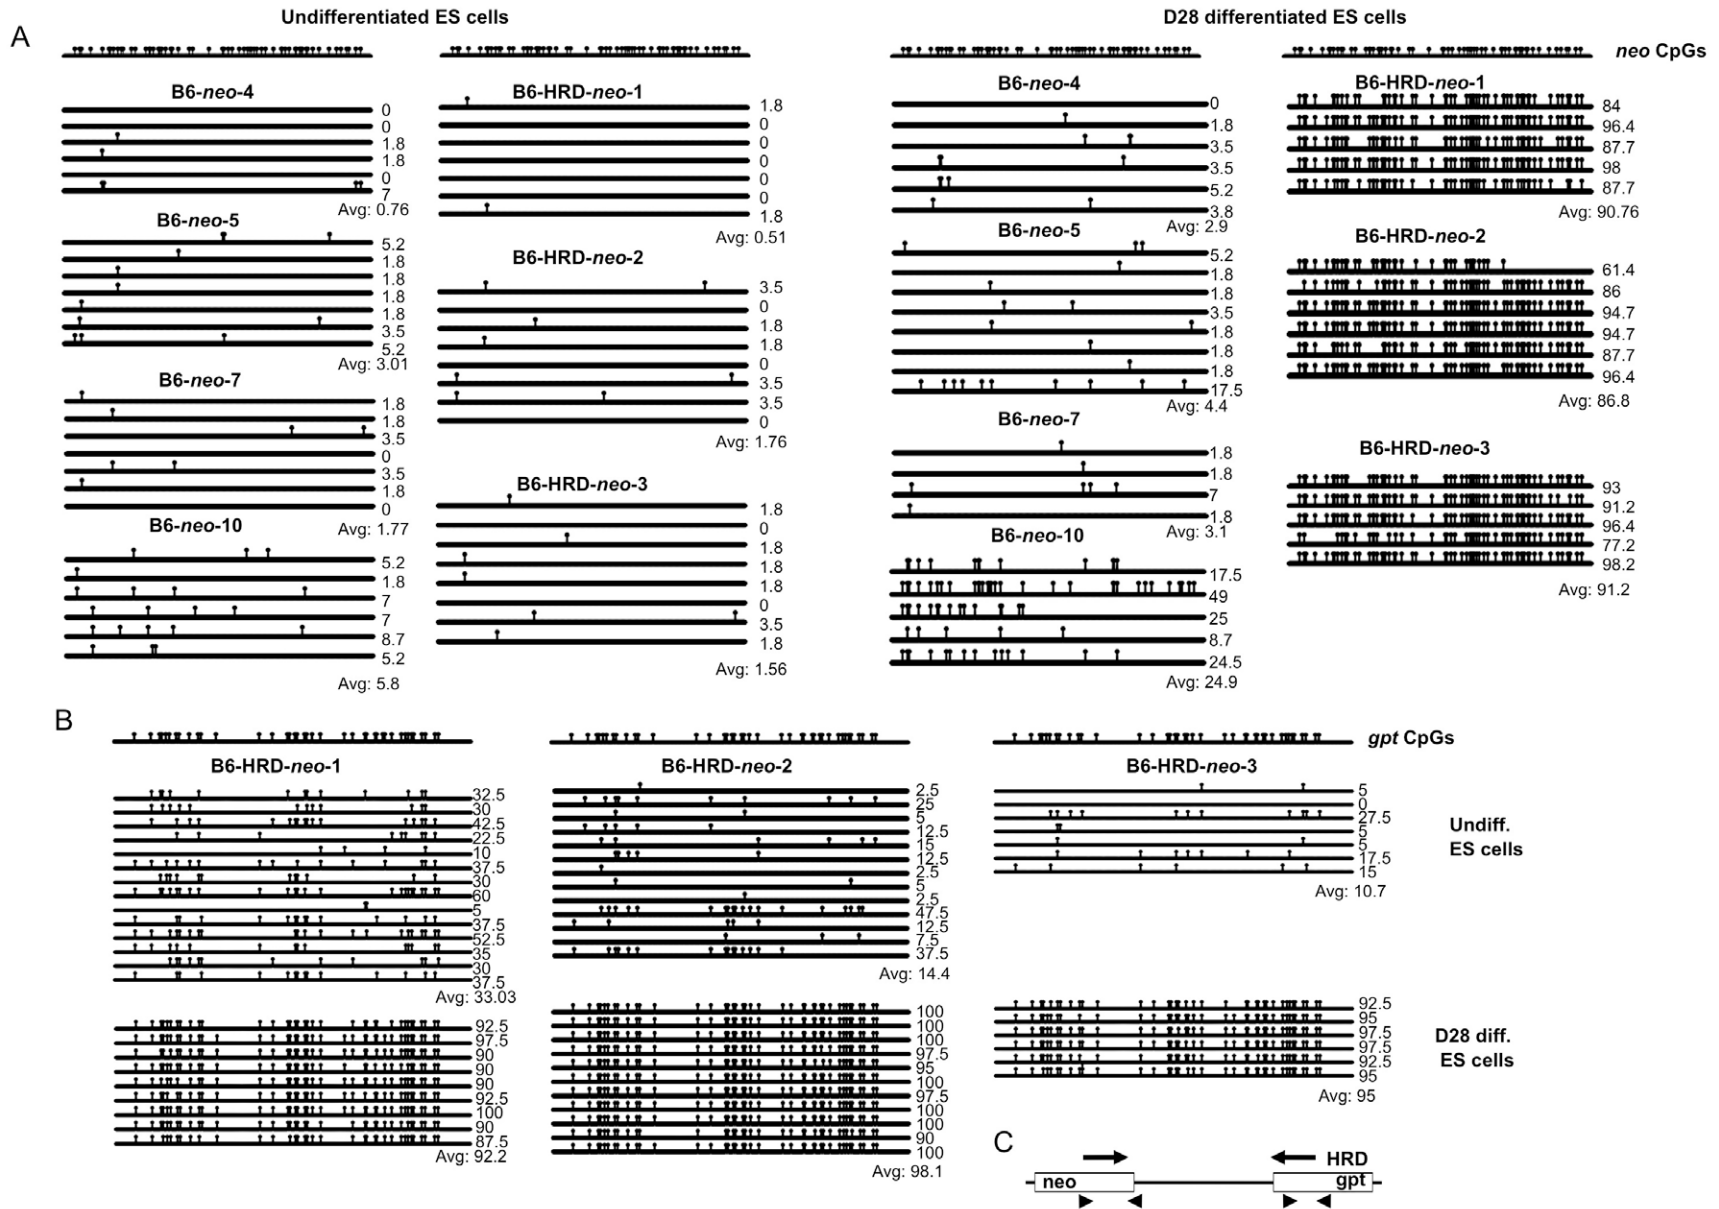

**Fig. S7: Specific methylation of *neo* gene in HRD-*neo* but not of *neo* gene alone upon differentiation.** (A) Bisulfite analysis showing lack of methylation in undifferentiated B6 ESCs of *neo* when alone (*B6-neo*) or when coupled to HRD (HRD-*neo*, map shown in C) (the two left panels). Upon differentiation to D28, *neo* remains unmethylated and HRD-*neo* shows complete methylation (the two right panels). All CpG dinucleotides present in the analyzed *neo* sequence are shown above the data. *B6-neo-4*, *B6-neo-5*, *B6-neo-7* and *B6-neo-10* are the four independent ESC lines transfected with *neo* alone, while *B6-HRD-neo-1*, *B6-HRD-neo-2*, *B6-HRD-neo-3* are the ESC lines transfected with HRD-*neo*. (B) Bisulfite analysis showing partial methylation of *gpt* in undifferentiated ESCs (Undiff. ESCs, upper panel) but increased *gpt* methylation in HRD-*neo* cells differentiated to D28 (D28 diff. ESCs, lower panel). All CpG dinucleotides present in the analyzed *gpt* sequence are shown above the data. (C) HRD-*neo* construct introduced into B6 ESCs. Primers used to analyze the bisulfite-treated *neo* and *gpt* regions are indicated below the construct.

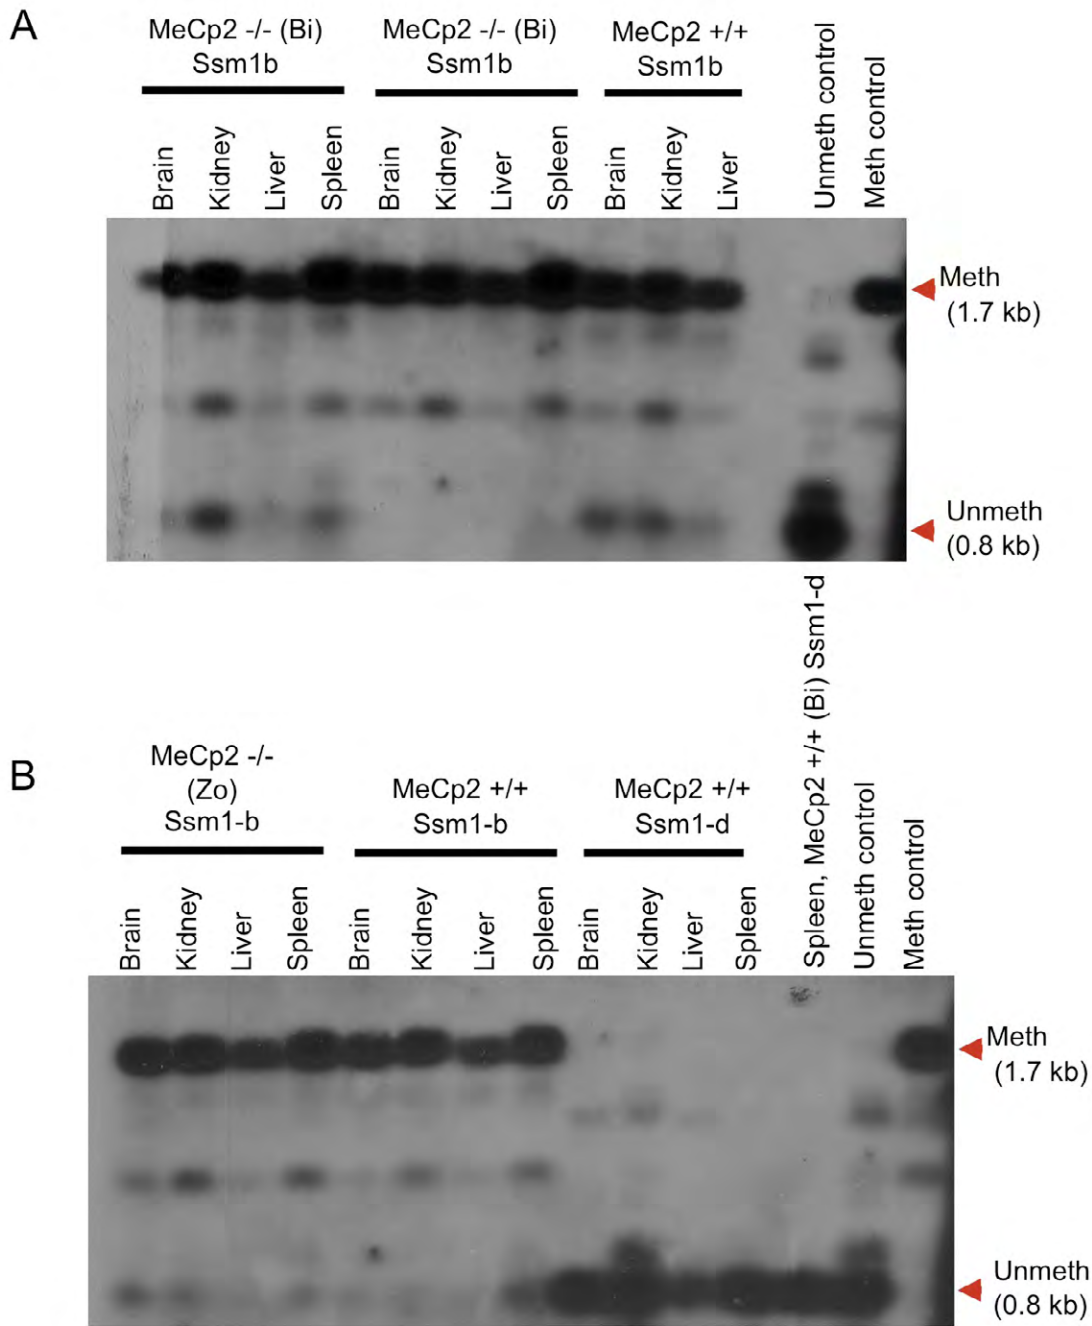

**Fig. S8: Role of *Mecp2* in HRD/*gpt* methylation.** Southern blots probed with *gpt* sequence showing that HRD stays methylated in various organs from mice lacking *Mecp2* expression (*Mecp2*<sup>-/-</sup>) as in control littermates (*Mecp2*<sup>+/+</sup>). (A) Mice with complete inactivation of *Mecp2* (Bi); (B) Mice with truncation of *Mecp2* within exon 4 (Zo). Meth: uncut (methylated) band, Unmeth: cut (unmethylated) band.



**Table S1. Primers used in this study**

| Gene                                   | Primers                                                                          | Product size | Location                                                                                                            | Cycling conditions                                                                                                                                             |
|----------------------------------------|----------------------------------------------------------------------------------|--------------|---------------------------------------------------------------------------------------------------------------------|----------------------------------------------------------------------------------------------------------------------------------------------------------------|
| BAC DNA                                | pBACe3.6F1<br>ATTTGGCGGTGTTGATACAGCGGG<br>pBACe3.6R1<br>GGGGTGATAGTGTGAGAAGACCTC | 417 bp       | In the BAC vector<br>pBACe3.6                                                                                       | (94°C for 30 sec, 57°C for 30 sec, 72° C for 45 sec) for 30 cycles                                                                                             |
| <i>Ssm1b</i> cDNA construct            | 3622F<br>GTCTCAATCAAGGAACCCACA<br>4448R<br>GTGGTATTTGTGAGCCAGGGCATT              | 827 bp       | Part of the linker region, Zn Finger domain, 3'UTR and part of the rabbit beta-globin polyA region in the construct | (94°C for 30 sec, 57°C for 30 sec, 72° C for 45 sec) for 35 cycles                                                                                             |
| Endogenous <i>Ssm1</i> cDNA expression | 18F<br>CAGGAAGCCATGGAAGGAGACTAG<br>2515R<br>GTGAAGGAGTTGTTGACTAGAAC              | 2.5 kb       | Most of the 5'UTR, KRAB domain, linker region, Zn Finger domain and most of the 3'UTR of <i>Ssm1b</i>               | (94°C for 30 sec, 56°C for 30 sec, 72° C for 2.5 min +2 sec/cycle) for 20 cycles followed by (94°C for 30 sec, 56°C for 30 sec, 72° C for 5 min for 15 cycles. |

|                   |                                                                                                                                                                |                                                                    |                                                                                                |                                                                    |
|-------------------|----------------------------------------------------------------------------------------------------------------------------------------------------------------|--------------------------------------------------------------------|------------------------------------------------------------------------------------------------|--------------------------------------------------------------------|
| <i>Ssm1b</i> DNA  | 495F<br>GGAAACTATGAGAAGGAGAAGG<br>2515R<br>GTGAAGGAGTTGTTGACTAGAAC                                                                                             | 2 kb                                                               | Linker region,<br>Zn Finger<br>region and<br>most of the<br>3'UTR of<br><i>Ssm1b</i>           | (94°C for 30 sec, 60°C for 30 sec, 72° C for 2 min) for 30 cycles  |
| <i>Dnmt3b</i>     | Common forward primer<br>TCACAGGGTACTTGGTGCTCAAGGA<br>Wild-type reverse primer<br>TACCTCCAACCTGCCCTGTTTGCCT<br>KO Reverse primer<br>ACACTCCAACCTCCGCAAACCTCCTA | +/+ 300<br>bp<br><br>+/- 300<br>bp and<br>223 bp<br><br>-/- 223 bp | Li <i>et al</i> 1992                                                                           | (94°C for 10 sec, 60°C for 30 sec, 72° C for 30 sec) for 30 cycles |
| <i>HRD</i>        | PMTF<br>CGCTCATGTGAAGTGTCCCAG<br>GPTR<br>CCTCACTTACTCCGTAGCTCC                                                                                                 | 450 bp                                                             | Region from<br>the <i>HRD</i><br>promoter to<br>part of the <i>gpt</i><br>region in <i>HRD</i> | (94°C for 30 sec, 58°C for 30 sec, 72° C for 45 sec) for 30 cycles |
| <i>Mecp2</i> (Bi) | Common primer oIMR 1436<br>GGT AAA GAC CCA TGT GAC CC<br>Wild-type primer oIMR<br>GGC TTG CCA CAT GAC AA<br>KO primer oIMR 1437<br>TCC ACC TAG CCT GCC TGT AC  | +/+ 416<br>bp<br>+/- 400<br>bp and<br>416 bp<br>-/- 400<br>bp      | Guy <i>et al.</i> 2001                                                                         | (94°C for 45 sec, 60°C for 1 min, 72° C for 1 min) for 35 cycles   |

|                              |                                                                                                                                                               |                                                                      |                                                                   |                                                                     |
|------------------------------|---------------------------------------------------------------------------------------------------------------------------------------------------------------|----------------------------------------------------------------------|-------------------------------------------------------------------|---------------------------------------------------------------------|
| <i>Mecp2</i> (Zo)            | Common primer oIMR 3912<br>AAC GGG GTA GAA AGC CTG<br>Wild-type primer oIMR 3913<br>TGA TGG GGT CCT CAG AGC<br>KO primer oIMR 3914<br>ATG CTC CAG ACT GCC TTG | +/+<br>396bp<br><br>+/-<br>318bp<br>and<br>396bp<br><br>-/-<br>318bp | Shahbazian <i>et al.</i> 2002                                     | (94°C for 45 sec, 62°C for 45 sec, 72° C for 45 sec) for 35 cycles  |
| Bisulfite-treated <i>gpt</i> | GPT F7<br>ATTGATGATTTGGTGGATATT<br>SV40B11<br>CACCACTACTCCCATTTCATC<br>GPT F10<br>TGTATTTTGTATTATTTTT<br>SV40B10<br>CAAACCCACTCATAAATCC                       | 518 bp<br>(nested<br>PCR<br>product)                                 | 2 <sup>nd</sup> half of the<br><i>gpt</i> region in<br><i>HRD</i> | (94°C for 1 min, 56°C for 2 min, 72° C for 2 min)<br>for 35 cycles  |
| Bisulfite-treated <i>neo</i> | Neo-F732<br>GGTTATTGAATAAGATGGATTGTA<br>Neo-R1430<br>CCAAACTCTTCAACAATATCAC                                                                                   | 699 bp                                                               | Neomycin-<br>resistant gene<br>in <i>HRD</i> and in<br><i>neo</i> | (94°C for 1 min, 58°C for 1 min, 72° C for 2 min)<br>for 30 cycles. |

**Table S2. Comparison of *Ssm1b* expression and HRD methylation during development.**

|                 | E6.5 |    | E7.5 |    | Early E8.5 |    | Late E8.5 |    | E9.5 |    | Adult tissues |    | EET |    | ESCs |     | Differentiated ESCs (d 28) |    |
|-----------------|------|----|------|----|------------|----|-----------|----|------|----|---------------|----|-----|----|------|-----|----------------------------|----|
| Mouse strain    | B6   | D2 | B6   | D2 | B6         | D2 | B6        | D2 | B6   | D2 | B6            | D2 | B6  | D2 | B6   | D2  | B6                         | D2 |
| Ssm1b expr.     | Yes  | NA | Yes  | NA | Yes        | NA | Yes       | NA | No   | NA | No            | No | NA  | NA | Yes  | No  | NA                         | NA |
| Ssm1-like expr. | Yes  | NA | Yes  | NA | Yes        | NA | Yes       | NA | Yes  | NA | Yes           | No | NA  | NA | Yes  | Yes | NA                         | NA |
| HRD meth        | 2+   | 0  | 2+   | 0  | 2+         | NA | 2+        | 0  | 3+   | 0  | 3+            | 0  | *   | *  | 1+   | 0   | 3+                         | 0  |

The expression of *Ssm1b* and other *Ssm1* family members was analyzed in B6 and D2 embryos (E6.5-E9.5), adult tissues (heart, blood), gametes, extra-embryonic tissues (EET) from various stages of early development, ESCs and day 28 differentiated ESCs. Expression (expr.) of *Ssm1b* was seen up to early E8.5 in B6 embryos and in undifferentiated ESCs. *Ssm1b* was never expressed at any stage in D2. The corresponding gain in HRD methylation is indicated by number with 0 depicting methylation no higher than 14.8% and 3+ depicting complete methylation based on percentage of CpG methylated in bisulfite assay. For EET, Southern blots showed intermediate methylation. \*, strain independent. NA, not analyzed.
